# Supplementary material
Source: PubMed Central journal article supplement (PMC3417219)
Supplement: supp_112.034413_ajcn034413_ST1-ST2.pdf [file supp_112.034413_ajcn034413_ST1-ST2.pdf]

1 **Supplemental Table 1.** Mean (SE) and selected percentiles (SE) of usual daily intake of sodium (mg): United States, National Health  
 2 and Nutrition Examination Survey 1988-1994 and 2003-2008<sup>1</sup>

| Sex/age category | Years   | N <sup>2</sup> | 25 <sup>th</sup> | 50 <sup>th</sup> | 75 <sup>th</sup> | Mean      | Mean difference <sup>3</sup> | P-value <sup>4</sup> |
|------------------|---------|----------------|------------------|------------------|------------------|-----------|------------------------------|----------------------|
| Males 19-30 y    | 1988-94 | 1902           | 4323 (548)       | 4717 (132)       | 5137 (433)       | 4746 (88) |                              |                      |
| Males 19-30 y    | 2003-08 | 1615           | 3601 (87)        | 4359 (102)       | 5191 (117)       | 4464 (83) | -282                         | 0.01                 |
| Males 31-50 y    | 1988-94 | 2533           | 3452 (95)        | 4271 (72)        | 5220 (108)       | 4418 (68) |                              |                      |
| Males 31-50 y    | 2003-08 | 2329           | 3580 (42)        | 4317 (51)        | 5156 (69)        | 4432 (55) | 14                           | 0.44                 |
| Males 51-70 y    | 1988-94 | 1942           | 3079 (120)       | 3672 (72)        | 4359 (104)       | 3781 (73) |                              |                      |
| Males 51-70 y    | 2003-08 | 2084           | 3005 (56)        | 3664 (64)        | 4414 (75)        | 3766 (64) | -15                          | 0.44                 |
| Males 71+ y      | 1988-94 | 1255           | 2496 (70)        | 3103 (59)        | 3793 (103)       | 3198 (63) |                              |                      |
| Males 71+ y      | 2003-08 | 1273           | 2443 (47)        | 2941 (53)        | 3510 (62)        | 3021 (54) | -177                         | 0.02                 |
| Females 19-30 y  | 1988-94 | 1901           | 2721 (188)       | 3107 (84)        | 3538 (123)       | 3159 (66) |                              |                      |
| Females 19-30 y  | 2003-08 | 1320           | 2527 (54)        | 3041 (63)        | 3618 (74)        | 3113 (64) | -46                          | 0.31                 |
| Females 31-50 y  | 1988-94 | 2939           | 2425 (73)        | 2946 (56)        | 3540 (57)        | 3032 (50) |                              |                      |
| Females 31-50 y  | 2003-08 | 2223           | 2432 (37)        | 2960 (42)        | 3570 (55)        | 3056 (46) | 24                           | 0.36                 |
| Females 51-70 y  | 1988-94 | 2065           | 2062 (50)        | 2535 (35)        | 3071 (41)        | 2613 (33) |                              |                      |
| Females 51-70 y  | 2003-08 | 2093           | 2267 (26)        | 2737 (31)        | 3275 (42)        | 2815 (34) | 202                          | <0.01                |
| Females 71+ y    | 1988-94 | 1368           | 1794 (64)        | 2294 (53)        | 2863 (72)        | 2395 (54) |                              |                      |
| Females 71+ y    | 2003-08 | 1271           | 1979 (29)        | 2348 (35)        | 2768 (43)        | 2405 (35) | 10                           | 0.44                 |

3 <sup>1</sup>Data for 1988-1994 are reprinted from Appendix D, Table D-8, p. 510, Institute of Medicine, Dietary Reference Intakes, 2005.<sup>4</sup> For  
 4 both surveys, data were adjusted using the Iowa State University Software for Intake Distribution Estimation. In addition, standard  
 5 errors were estimated using jackknife replication(SIDE). In 1988-1994 C-SIDE was used and in 2003-2008 PC-SIDE was used. For  
 6 2003-2008, data were adjusted interview method (1<sup>st</sup> or 2<sup>nd</sup> 24-hour dietary recall) and the day of the week. In both surveys, data are  
 7 limited to individuals who provided a complete reliable dietary recall on Day 1. In addition, women who were pregnant or lactating or  
 8 missing information on pregnant and lactating status were excluded from analysis.

9 <sup>2</sup>unweighted sample size for sex/age category.

10 <sup>3</sup>Difference in mean sodium intake (mean sodium intake in 2003-2008 – mean sodium intake in 1988-1994).

11 <sup>4</sup>P-value for difference in mean sodium intake based on Z-test.

12 **Supplemental Table 2.** Mean (SE) and selected percentiles (SE) of usual daily intake of potassium (mg): United States, National  
 13 Health and Nutrition Examination Survey 1988-1994 and 2003-2008<sup>1</sup>

| Sex/age category | Years   | N <sup>2</sup> | 25 <sup>th</sup> | 50 <sup>th</sup> | 75 <sup>th</sup> | Mean      | Mean difference <sup>3</sup> | P-value <sup>4</sup> |
|------------------|---------|----------------|------------------|------------------|------------------|-----------|------------------------------|----------------------|
| Males 19-30 y    | 1988-94 | 1902           | 3000 (168)       | 3343 (60)        | 3714 (148)       | 3374 (56) |                              |                      |
| Males 19-30 y    | 2003-08 | 1615           | 2388 (48)        | 2908 (50)        | 3505 (62)        | 2992 (51) | -382                         | <0.01                |
| Males 31-50 y    | 1988-94 | 2533           | 2697 (72)        | 3321 (48)        | 4037 (54)        | 3432 (43) |                              |                      |
| Males 31-50 y    | 2003-08 | 2329           | 2635 (35)        | 3179 (39)        | 3792 (49)        | 3257 (41) | -175                         | <0.01                |
| Males 51-70 y    | 1988-94 | 1942           | 2547 (51)        | 3190 (54)        | 3938 (79)        | 3314 (55) |                              |                      |
| Males 51-70 y    | 2003-08 | 2084           | 2469 (42)        | 2933 (44)        | 3594 (48)        | 3082 (43) | -232                         | <0.01                |
| Males 71+ y      | 1988-94 | 1255           | 2321 (69)        | 2836 (44)        | 3423 (54)        | 2918 (45) |                              |                      |
| Males 71+ y      | 2003-08 | 1273           | 2216 (40)        | 2700 (47)        | 3240 (57)        | 2764 (49) | -154                         | 0.01                 |
| Females 19-30 y  | 1988-94 | 1901           | 1921 (86)        | 2208 (33)        | 2518 (72)        | 2233 (31) |                              |                      |
| Females 19-30 y  | 2003-08 | 1320           | 1693 (38)        | 2058 (43)        | 2478 (53)        | 2118 (44) | -115                         | 0.02                 |
| Females 31-50 y  | 1988-94 | 2939           | 2009 (57)        | 2429 (41)        | 2898 (54)        | 2489 (39) |                              |                      |
| Females 31-50 y  | 2003-08 | 2223           | 1895 (28)        | 2321 (33)        | 2799 (40)        | 2380 (33) | -109                         | 0.02                 |
| Females 51-70 y  | 1988-94 | 2065           | 2000 (37)        | 2435 (31)        | 2932 (41)        | 2506 (30) |                              |                      |
| Females 51-70 y  | 2003-08 | 2093           | 1922 (43)        | 2366 (46)        | 2858 (70)        | 2419 (45) | -87                          | 0.05                 |
| Females 71+ y    | 1988-94 | 1368           | 1873 (45)        | 2343 (41)        | 2873 (54)        | 2407 (42) |                              |                      |
| Females 71+ y    | 2003-08 | 1271           | 1780 (62)        | 2174 (41)        | 2619 (54)        | 2234 (31) | -173                         | <0.01                |

14 <sup>1</sup>Data for 1988-1994 are reprinted from Appendix D, Table D-5, p. 504, Institute of Medicine, Dietary Reference Intakes, 2005.<sup>4</sup> For  
 15 both surveys, data were adjusted for within-individual day-to-day variation in intake using the Iowa State University Software for  
 16 Intake Distribution Estimation (SIDE). In 1988-1994 C-SIDE was used and in 2003-2008 PC-SIDE was used. Standard errors were  
 17 estimated using jackknife replication. For 2003-2008, data were adjusted for interview method (1<sup>st</sup> or 2<sup>nd</sup> 24-hour dietary recall) and  
 18 the day of the week. In both surveys, data are limited to individuals who provided a complete reliable dietary recall on Day 1. In  
 19 addition, women who were pregnant or lactating or missing information on pregnant and lactating status were excluded from analyses.

20 <sup>2</sup>unweighted sample size for sex/age category.

21 <sup>3</sup>Difference in mean potassium intake (mean potassium intake in 2003-2008 – mean potassium intake in 1988-1994).

22 <sup>4</sup>P-value for difference in mean potassium intake based on Z-test.
